# Supplementary material for: Socio-ecological features other than sex affect habitat selection in the socially obligate monogamous Eurasian beaver
Source: Springer Nature journal article supplement (doi:10.1007/s00442-015-3388-1), 2015-08-10

## Electronic Supplementary Material

Table A1. Model diagnostics of the six *a priori* defined candidate models to estimate population wide resource selection of Eurasian beavers in Telemark, southern Norway (2009-2013).  $\Delta AIC_c$  = Akaikes Information Criterion difference,  $AIC_{wt}$  = Akaikes Information Criterion model weight. ✓ indicates whether or not a variable was included in a candidate model.

| Model   | Distance to the nearest: |       |      |       |          | Slope | River/Lake | Land cover | $\Delta AIC_c$ | $AIC_{wt}$ |
|---------|--------------------------|-------|------|-------|----------|-------|------------|------------|----------------|------------|
|         | Road                     | Lodge | Land | Water | Building |       |            |            |                |            |
| Full    | ✓                        | ✓     | ✓    | ✓     | ✓        | ✓     | ✓          | ✓          | 0              | 1          |
| Expert  |                          | ✓     | ✓    | ✓     |          | ✓     | ✓          | ✓          | 85.25          | 0          |
| Bank    |                          |       | ✓    | ✓     |          | ✓     |            |            | 304.18         | 0          |
| Null    |                          |       |      |       |          |       |            |            | 5362.7         | 0          |
| Human   | ✓                        |       |      |       | ✓        |       |            |            | 5353.96        | 0          |
| Terrain |                          |       |      |       |          | ✓     | ✓          | ✓          | 3875.61        | 0          |

Figure A1: Frequency distributions of GPS relocations of beavers in relation to distance to land (when being in the water), and distance to water (when being on land).

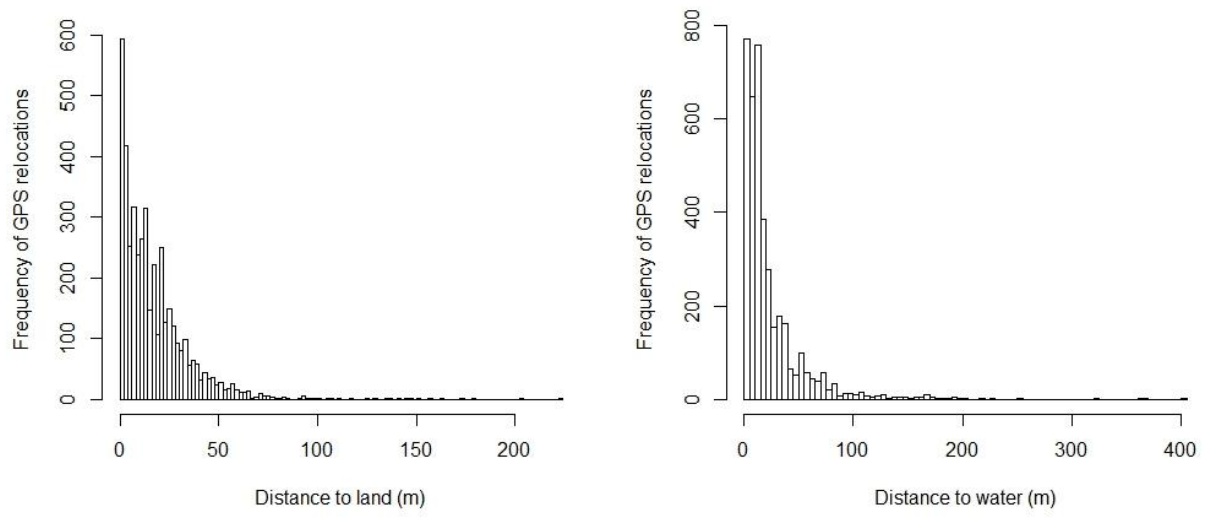

Figure A2: Relationship between family size and selection behavior for 'Distance to the nearest lodge'.

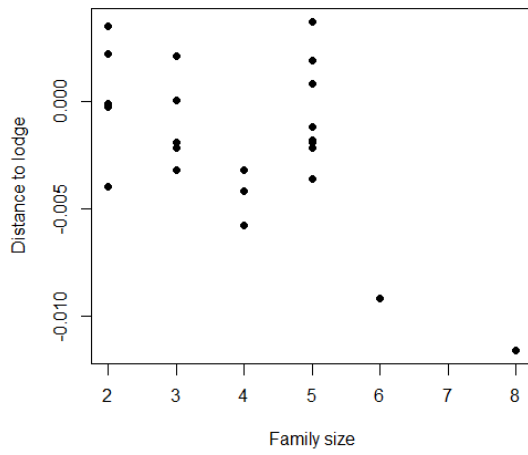

Figure A3: Relationship between family size and selection behavior for 'Distance to the land'.

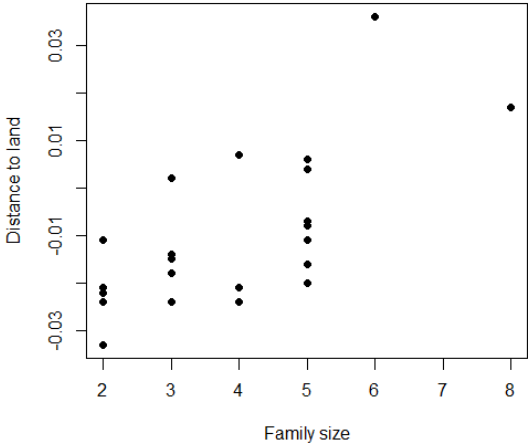

Figure A4: Relationship between family size and selection behavior for 'Distance to the nearest building'.

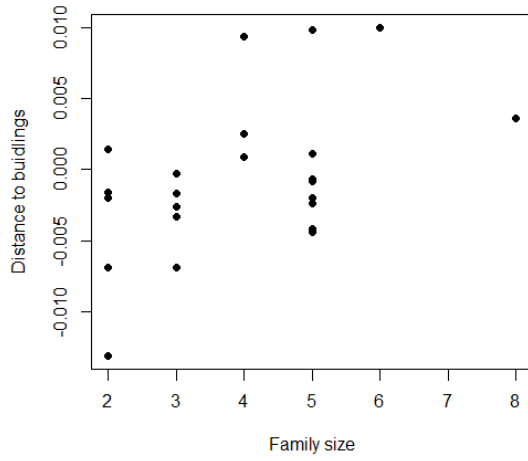

Supplement: MOESM1 [file 442_2015_3388_MOESM1_ESM.pdf]
